# Supplementary material for: Neural differentiation on aligned fullerene C60nanowhiskers
Source: Royal Society of Chemistry journal article supplement (doi:10.1039/c7cc06395d), 2017-01-01
Supplement: c7cc06395d1.pdf [file c7cc06395d1.pdf]

## Electronic Supplementary Information for

### Neural differentiation on aligned fullerene C<sub>60</sub> nanowhiskers

*Fu-Yu Hsieh,<sup>a</sup> Lok Kumar Shrestha,<sup>b</sup> Katsuhiko Ariga<sup>\*bc</sup>, Shan-hui Hsu<sup>\*ade</sup>*

<sup>a</sup> Institute of Polymer Science and Engineering, National Taiwan University, Taipei, Taiwan

<sup>b</sup> Supermolecules Group, International Center for Materials Nanoarchitectonics (WPI-MANA),  
National Institute for Materials Science (NIMS), 1-1 Namiki, Tsukuba, Ibaraki 305-0044, Japan

<sup>c</sup> Graduate School of Frontier Science, University of Tokyo, Kashiwa 277-0827, Japan

<sup>d</sup> Center of Tissue Engineering and 3D printing, National Taiwan University, Taipei, Taiwan

<sup>e</sup> Institute of Cellular and System Medicine, National Health Research Institutes, Miaoli, Taiwan

E-mail: shhsu@ntu.edu.tw

## **Experimental Section**

### **Materials**

Pristine fullerene C<sub>60</sub> powder with purity > 99.5% was purchased from Materials Technologies Research (MTR), Ltd. (Cleveland, OH, USA). Toluene and IPA with purity > 99% were purchased from the Wako Chemical Corp., Japan. All chemicals were used as received.

### **Preparation and purification of C<sub>60</sub> NWs (see main text)**

C<sub>60</sub> NWs were prepared using the modified LLIP method. Xylene (or toluene) was used as the solvent and IPA was used as the non-solvent.

### **Alignment of C<sub>60</sub> NWs (see main text)**

C<sub>60</sub> NWs were aligned at the air-water interface with a constant reciprocal linear shaking motion at 3 cm/sec contained in a 100 mL beaker. Glass microscope slides were used to collect and deposit the aligned C<sub>60</sub> NWs. A typical linear shaker apparatus used was the reciprocal shaker from Major Science (Taiwan).

### **Characterization of C<sub>60</sub> NWs**

The morphology and size distribution of the C<sub>60</sub> NWs were observed by a scanning electron microscope (SEM; Hitachi S-4800, Japan). Raman spectra were recorded by Raman scattering (UniD2G, UniNano Tech Co., Korea) operating at a 532 nm excitation wavelength with the power level set to 1.0 mW. The crystallinity of C<sub>60</sub> NWs was analyzed by the X-ray powder diffraction (XRD, X'Pert, PANalytical, Netherland) over the 2 $\theta$  range from 10 to 30° at a rate of 0.02°/s, using Cu-K $\alpha$  radiation (40 kV, 40 mA).

### **Culture of murine neural stem cells (NSCs)**

Murine NSCs were isolated from adult mouse brain and transfected with the promoter F1B-green fluorescence protein (F1B-GFP). NSCs were plated onto T75 flask in chemically defined neurosphere medium [F12 nutrient mix, DMEM (both Gibco, USA), 400  $\mu$ g/ml G418 (Invitrogen), and 100 U/ml Pen-Strep (Gibco, USA) supplemented with 10% fetal bovine serum (FBS, Gibco, USA) as growth factors] in an incubator set at 37 °C and 5% CO<sub>2</sub> in a humidified atmosphere.

### **Cell viability**

NSCs were seeded at a density of 1.5 $\times$ 10<sup>5</sup> cells per well in the 6-well tissue culture polystyrene (TCPS) plates or on C<sub>60</sub> NW substrates and were incubated at 37 °C for 72 h. The cell viability on various C<sub>60</sub> NWs substrates at 72 h was evaluated by the

Nucleocounter® NC-3000™. The numbers of live (healthy)/live (unhealthy)/dead cells on C<sub>60</sub> NWs were counted based on staining with fluorophore VB-48, acridine orange (AO), and propidium iodide (PI) solution. Finally, the percent viable cells were normalized to that on the TCPS dish (control).

### **Gene expression analysis**

The total RNA was extracted by the Trizol® reagent (Invitrogen, USA) from NSCs. The purity of total RNA were checked by a ratio of A260/A280 (>1.9). Total RNA (1 µg) was used to synthesize cDNA in 20 µl reaction solution using a kit of RevertAid™ First Strand cDNA Synthesis Kit (MBI Fermentas, St. Leon-Rot, Germany). Then 2 µl of cDNA was used for qPCR assay in triplicates with DyNAmo Flash SYBR Green qPCR Kit (Finnzymes Oy, Espoo, Finland). PCR consisting of denaturing at 95 °C for 10 min, annealing and extension for 30 s at 60 °C was operated by an Applied Biosystems® StepOne™. The expression was normalized to that of GAPDH. The primer sequences for each gene used in this study are shown in **Table S1**.

### **Immunofluorescent staining for NSCs on C<sub>60</sub> NWs substrates**

The protein expression of Nestin, glial fibrillary acidic protein (GFAP), β-tubulin, and Microtubule-associated protein 2 (MAP2) was analyzed by immunofluorescent staining. NSCs were seeded on C<sub>60</sub> NWs film and washed by wash buffer and fixed with 4% paraformaldehyde solution for 30 min. The samples blocked with 2% Goat serum for 1 h and stained with Nestin (GeneTex, GTX26142), β-tubulin (Proteintech, 10068-1-AP), MAP2 (BioLegend, B206152), and GFAP for 1 h at 25°C. The samples were washed with wash buffer and incubated with a secondary goat anti-rabbit or anti-mouse IgG antibody (GeneTex) for 1 h at 25 °C. The samples were washed with wash buffer and observed by the fluorescence microscope.

### **Statistical analyses**

Data were analyzed by one-way ANOVA as appropriate. The data of qPCR and invasion assay are presented as mean ± SEM. The rest of data is presented as mean ± SD. A probability value ≤ 0.05 was regarded as significant.

## Supplemental tables and figures:

**Table S1.** The primer sequences used for real-time RT-PCR analysis.

| Genes            | Primer sequences                                                  | Annealing temperature (°C) |
|------------------|-------------------------------------------------------------------|----------------------------|
| GAPDH            | Forward: AGAACATCATCCCTGCATC<br>Reverse: ACTCCTCAGCAACTGAGGG      | 60                         |
| nestin           | Forward: GTGGCCTCTGGGATGATG<br>Reverse: TTGACCTTCCTCCCCCTC        | 60                         |
| $\beta$ -tubulin | Forward: AGCTGTTCAAACGCATCTCG<br>Reverse: GACACCAGGTCATTCATGTTGC  | 60                         |
| MAP2             | Forward: TTCTCCACTGTGGCTGTTTG<br>Reverse: GAGCCTGTTTGTAGACTGGAAGA | 60                         |
| GFAP             | Forward: CCTTCCTTCCCTGGTTTTCT<br>Reverse: TGCTCATCTTTCCTCTTCCC    | 60                         |

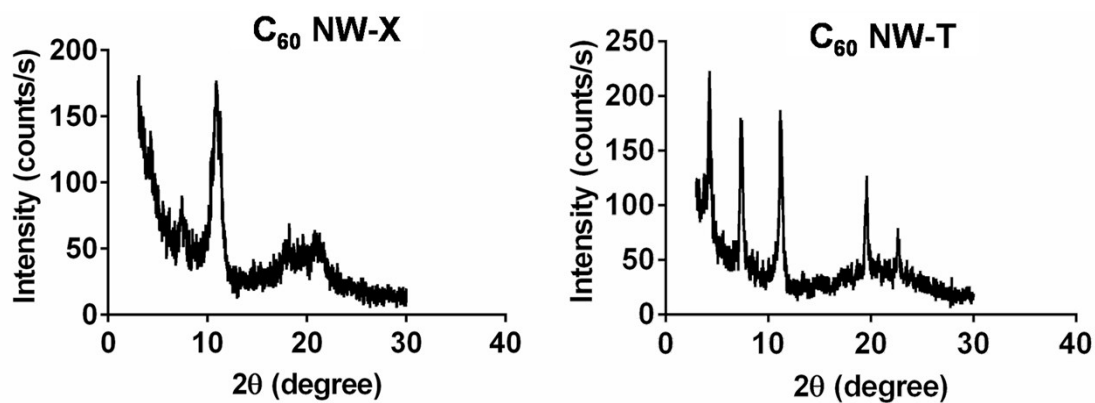

**Figure S1.** XRD patterns for the aligned fullerene NWs. According to the data, we found that the NWs made from m-xylene showed higher crystallinity in (111) planes than those prepared by toluene. Moreover, the pattern of fullerene NWs made from m-xylene was almost the same with that of the pristine fullerene. These results indicated that the fullerene NWs made from m-xylene had a more horizontally aligned structure in (111) planes. This may account for the better effect of C<sub>60</sub> NW-X on promoting NSC differentiation into neurons.

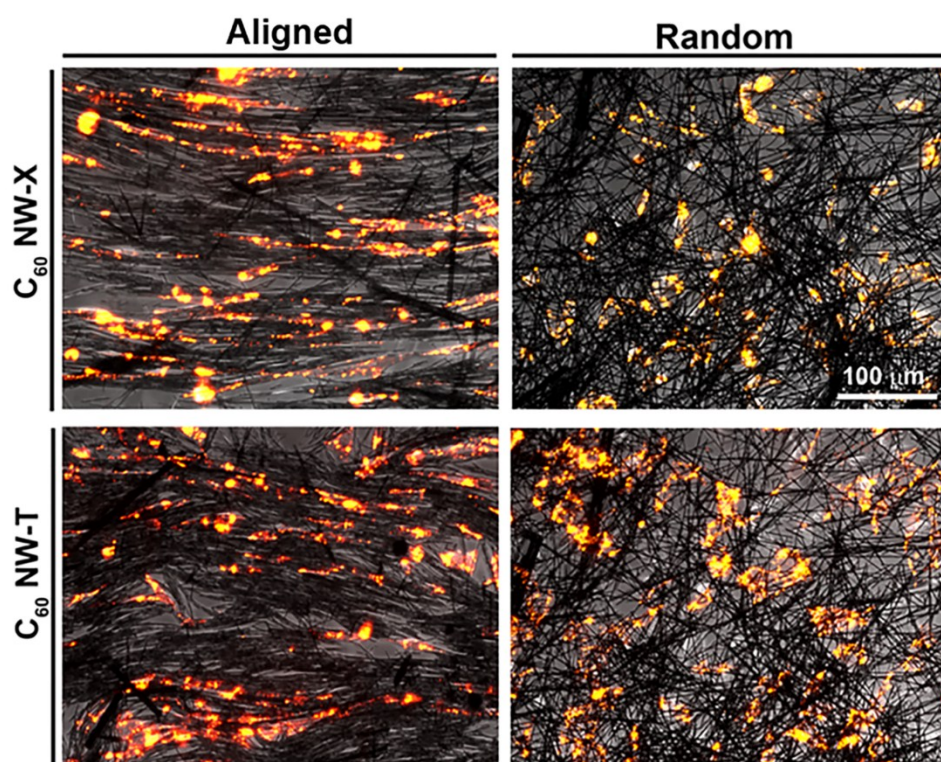

**Figure S2.** The morphology of NSCs grown on the aligned or random C<sub>60</sub> NWs for 24 h. NSCs on the aligned C<sub>60</sub> NWs were observed to orient with the C<sub>60</sub> NWs.

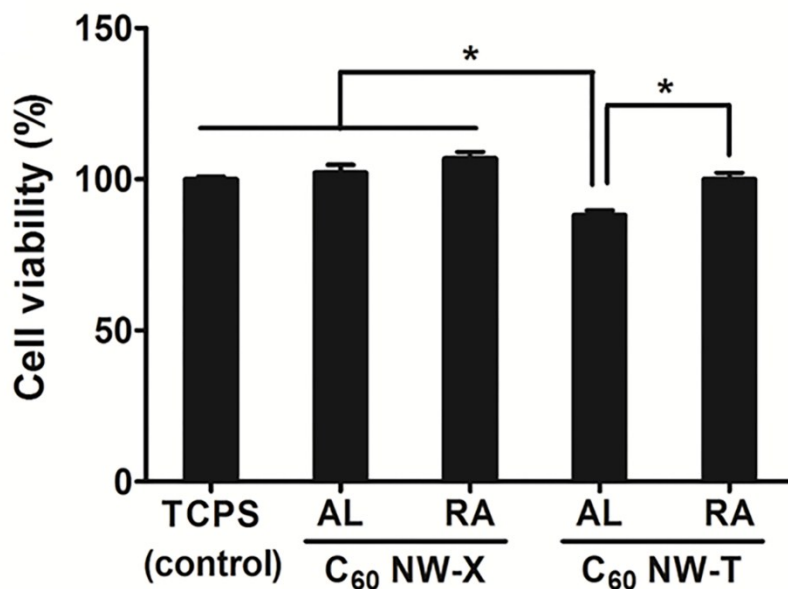

**Figure S3.** The cell viability for NSCs grown on C<sub>60</sub> NWs after 72 h, compared to the control TCPS.

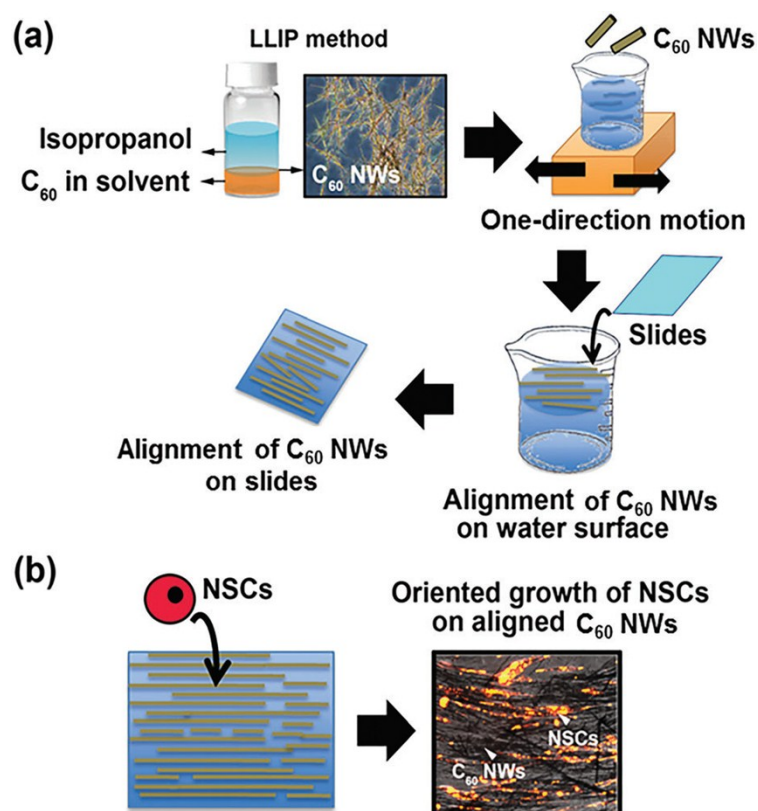

**Figure S4.** Schematic illustration for the preparation of highly aligned C<sub>60</sub> NWs and growing neural stem cells (NSCs) on the NW scaffolds. (a) The alignment of C<sub>60</sub> NWs was obtained at an air–water interface by the

reciprocal one-directional shaking flow. (b) The aligned C60 NWs were used as scaffolds for directing NSC growth.
